# Supplementary material for: Exploring changes in family routines and family quality of life among Israeli families during the COVID-19 pandemic
Source: PeerJ journal article supplement (doi:10.7717/peerj.19587), 2025-07-03
Supplement: Variables_COVID19_Article_update.pdf [file Variables_COVID19_Article_update.pdf]

## **Categorical Data**

| <b>Line</b>  | <b>Variable name</b>                                      | <b>Values</b>                                              |
|--------------|-----------------------------------------------------------|------------------------------------------------------------|
| Line 1       | No                                                        |                                                            |
| Line 2       | Parent 1 age                                              |                                                            |
| Line 3       | Parent 2 age                                              |                                                            |
| Line 4       | Role (Who fulfills the questionnaire)                     | 1. Mother                                                  |
|              |                                                           | 2. Father                                                  |
| Line 5       | Education (for the parent who fulfills the questionnaire) | 1. High school                                             |
|              |                                                           | 2. Vocational                                              |
|              |                                                           | 3. Academic                                                |
| Line 6       | Income                                                    | 1. Above the average monthly salary                        |
|              |                                                           | 2. Below the average monthly salary                        |
| Line 7       | Place of Residence                                        | 1. City                                                    |
| Line 8       | No. of children                                           | 2. Other                                                   |
| Line 9-36    | FRI_routineB_Q1-Q28                                       | FRI Routine items before the COVID-19                      |
| Line 37-64   | FRI_importentB_Q1-Q28                                     | FRI Important items before the COVID-19                    |
| Line 65-92   | FRI_routineK_Q1-Q28                                       | FRI Routine items during the COVID-19                      |
| Line 93-120  | FRI_importentK_Q1-Q28                                     | FRI Important items during the COVID-19                    |
| Line 121     | FRI_routine_B                                             | FRI Routine sum of the items before the COVID-19           |
| Line 122     | FRI_routine_K                                             | FRI Routine sum of the items during the COVID-19           |
| Line 123     | FRI_importent_B                                           | FRI important sum of the items before the COVID-19         |
| Line 124     | FRI_importent_K                                           | FRI important sum of the items during the COVID-19         |
| Line 125     | FRI_R_1_K                                                 | Factor 1 routine: Inside-family interactions               |
| Line 126     | FRI_R_2_K                                                 | Factor 2 routine: Outside- family interactions             |
| Line 127     | FRI_R_3_K                                                 | Factor 3 routine: Morning/ evening routines                |
| Line 128     | FRI_I_1_K                                                 | Factor 1 important: Inside-family interactions             |
| Line 129     | FRI_I_2_K                                                 | Factor 2 important: Outside- family interactions           |
| Line 130     | FRI_I_3_K                                                 | Factor 3 important: Morning/ evening routines              |
| Line 131-151 | FQL_B_Q1-Q21                                              | FQL – 21 items before the COVID-19                         |
| Line 152-172 | FQL_K_Q1-Q21                                              | FQL – 21 items during the COVID-19                         |
| Line 173     | FQL_B_familiy_interaction_M                               | Mean of items: 1, 7, 10–12, and 18 before the COVID-19     |
| Line 174     | FQL_B_Parenting_M                                         | Mean of items: 2, 5, 8, 14, 17, and 19 before the COVID-19 |
| Line 175     | FQL_B_emotional_wellbeing_M                               | Mean of items 3, 4, 9, and 13 before the COVID-19          |
| Line 176     | FQL_B_physical_material_wellbeing_M                       | Mean of items 6, 15, 16, 20, and 21 before the COVID-19    |
| Line 177     | FQL_B_total_wellbeing_M                                   | The mean of 21 items before the COVID-19                   |
| Line 178     | FQL_K_familiy_interaction_M                               | Mean of items: 1, 7, 10–12, and 18 during the COVID-19     |
| Line 179     | FQL_K_Parenting_M                                         | Mean of items: 2, 5, 8, 14, 17, and 19 during the COVID-19 |
| Line 180     | FQL_K_emotional_wellbeing_M                               | Mean of items 3, 4, 9, and 13 during the COVID-19          |
| Line 181     | FQL_K_physical_material_wellbeing_M                       | Mean of items 6, 15, 16, 20, and 21 during the COVID-19    |
| Line 182     | FQL_K_total_wellbeing_M                                   | The mean of 21 items during the COVID-19                   |
